# Supplementary material for: Impact Evaluation of Prefabricated Buildings Cost on Game Theory‐Cloud Model
Source: Hindawi journal article supplement (doi:10.1155/2022/3635009), 2022-01-01
Supplement: f1 [file 3635009.f1.docx]

**Supplementary Materials**

Table S1: The evaluation index matrix of *C1j*.

| Experts | C11 | C12 | C13 | C14 | C15 |
| --- | --- | --- | --- | --- | --- |
| 1 | 9 | 7 | 8.5 | 7 | 7 |
| 2 | 7 | 9 | 9.5 | 7.5 | 7.5 |
| 3 | 7 | 9 | 7.5 | 6 | 3 |
| 4 | 8 | 7 | 6.5 | 3 | 5 |
| 5 | 9.5 | 7.5 | 7 | 5 | 7 |
| 6 | 9 | 9 | 9 | 9 | 9 |
| 7 | 7.5 | 6 | 8 | 7 | 7.5 |
| 8 | 7 | 7 | 3.5 | 5.5 | 6.5 |
| 9 | 9.5 | 9.5 | 9 | 6.5 | 5 |
| 10 | 5 | 5 | 6 | 4.5 | 5.5 |

Table S2: The standardization matrix of *C1j*.

| Experts | C11 | C12 | C13 | C14 | C15 |
| --- | --- | --- | --- | --- | --- |
| 1 | 3.474 | 1.474 | 4.632 | 3.667 | 3.667 |
| 2 | 1.474 | 3.474 | 5.632 | 4.167 | 4.167 |
| 3 | 1.474 | 3.474 | 3.632 | 2.667 | 0.333 |
| 4 | 2.474 | 1.474 | 2.632 | 0.333 | 1.667 |
| 5 | 3.974 | 1.974 | 3.132 | 1.667 | 3.667 |
| 6 | 3.474 | 3.474 | 5.132 | 5.667 | 5.667 |
| 7 | 1.974 | 0.474 | 4.132 | 3.667 | 4.167 |
| 8 | 1.474 | 1.474 | 0.368 | 2.167 | 3.167 |
| 9 | 3.974 | 3.974 | 5.132 | 3.167 | 1.667 |
| 10 | 0.526 | 0.526 | 2.132 | 1.167 | 2.167 |

Table S3: The evaluation index matrix of *C2j*.

| Experts | C21 | C22 | C23 | C24 |
| --- | --- | --- | --- | --- |
| 1 | 9 | 9 | 7 | 7.5 |
| 2 | 2.5 | 5 | 7 | 6.5 |
| 3 | 5 | 7.5 | 6.5 | 7.5 |
| 4 | 6 | 5.5 | 3 | 3 |
| 5 | 9 | 7 | 9 | 7 |
| 6 | 9.5 | 9 | 9 | 9 |
| 7 | 7.5 | 7.5 | 5 | 5.5 |
| 8 | 5 | 3 | 7.5 | 5 |
| 9 | 9 | 6.5 | 9 | 4.5 |
| 10 | 5 | 5 | 5 | 4.5 |

Table S4: The standardization matrix of *C2j*.

| Experts | C21 | C22 | C23 | C24 |
| --- | --- | --- | --- | --- |
| 1 | 6.237 | 5.667 | 3.667 | 4.167 |
| 2 | 0.263 | 1.667 | 3.667 | 3.167 |
| 3 | 2.237 | 4.167 | 3.167 | 4.167 |
| 4 | 3.237 | 2.167 | 0.333 | 0.333 |
| 5 | 6.237 | 3.667 | 5.667 | 3.667 |
| 6 | 6.737 | 5.667 | 5.667 | 5.667 |
| 7 | 4.737 | 4.167 | 1.667 | 2.167 |
| 8 | 2.237 | 0.333 | 4.167 | 1.667 |
| 9 | 6.237 | 3.167 | 5.667 | 1.167 |
| 10 | 2.237 | 1.667 | 1.667 | 1.167 |

Table S5: The evaluation index matrix of *C3j*.

| Experts | C31 | C32 | C33 |
| --- | --- | --- | --- |
| 1 | 6.5 | 7.5 | 7 |
| 2 | 7 | 3 | 7.5 |
| 3 | 9 | 7.5 | 5.5 |
| 4 | 5 | 5.5 | 2.5 |
| 5 | 7.5 | 9 | 7 |
| 6 | 9.5 | 5 | 9 |
| 7 | 3 | 5.5 | 4.5 |
| 8 | 5.5 | 5 | 7 |
| 9 | 9 | 4.5 | 7.5 |
| 10 | 5.5 | 5 | 5.5 |

Table S6: The standardization matrix of C3j.

| Experts | C31 | C32 | C33 |
| --- | --- | --- | --- |
| 1 | 3.184 | 4.167 | 4.222 |
| 2 | 3.684 | 0.333 | 4.722 |
| 3 | 5.684 | 4.167 | 2.722 |
| 4 | 1.684 | 2.167 | 0.278 |
| 5 | 4.184 | 5.667 | 4.222 |
| 6 | 6.184 | 1.667 | 6.222 |
| 7 | 0.316 | 2.167 | 1.722 |
| 8 | 2.184 | 1.667 | 4.222 |
| 9 | 5.684 | 1.167 | 4.722 |
| 10 | 2.184 | 1.667 | 2.722 |

Table S7: The evaluation index matrix of *C4j*.

| Experts | C41 | C42 | C43 | C44 |
| --- | --- | --- | --- | --- |
| 1 | 9 | 6.5 | 7 | 8 |
| 2 | 7 | 7.5 | 8 | 7.5 |
| 3 | 5.5 | 7 | 7.5 | 7 |
| 4 | 4.5 | 5.5 | 5 | 5 |
| 5 | 6 | 6.5 | 6.5 | 6.5 |
| 6 | 2 | 3 | 3 | 3 |
| 7 | 5 | 4.5 | 5 | 7 |
| 8 | 6.5 | 5 | 4.5 | 7.5 |
| 9 | 9 | 7.5 | 9 | 9.5 |
| 10 | 4.5 | 5.5 | 5 | 4 |

Table S8: The standardization matrix of *C4j*.

| Experts | C41 | C42 | C43 | C44 |
| --- | --- | --- | --- | --- |
| 1 | 6.778 | 3.100 | 3.667 | 4.684 |
| 2 | 4.778 | 4.100 | 4.667 | 4.184 |
| 3 | 3.278 | 3.600 | 4.167 | 3.684 |
| 4 | 2.278 | 2.100 | 1.667 | 1.684 |
| 5 | 3.778 | 3.100 | 3.167 | 3.184 |
| 6 | 0.222 | 0.400 | 0.333 | 0.316 |
| 7 | 2.778 | 1.100 | 1.667 | 3.684 |
| 8 | 4.278 | 1.600 | 1.167 | 4.184 |
| 9 | 6.778 | 4.100 | 5.667 | 6.184 |
| 10 | 2.278 | 2.100 | 1.667 | 0.684 |

Table S1: Ten prefabricated building experts were invited to score the indicator *C1j*, form the evaluation index matrix of *C1j*.

Table S2: According to formula (1), standardize the data in the evaluation index matrix of *C1j*, so as to obtain the standardization matrix of *C1j*.

(1)

In formula (1), is the normalized value.

Table S3: Ten prefabricated building experts were invited to score the indicator *C2j*, form the evaluation index matrix of *C2j*.

Table S4: According to formula (1), standardize the data in the evaluation index matrix of *C2j*, so as to obtain the standardization matrix of *C2j*.

Table S5: Ten prefabricated building experts were invited to score the indicator *C3j*, form the evaluation index matrix of *C3j*.

Table S6: According to formula (1), standardize the data in the evaluation index matrix of *C3j*, so as to obtain the standardization matrix of *C3j*.

Table S7: Ten prefabricated building experts were invited to score the indicator *C4j*, form the evaluation index matrix of *C4j*.

Table S8: According to formula (1), standardize the data in the evaluation index matrix of *C4j*, so as to obtain the standardization matrix of *C4j*.
